# Supplementary material for: A Prediction Model Based on Biomarkers and Clinical Characteristics for Detection of Lung Cancer in Pulmonary Nodules
Source: PubMed Central journal article supplement — Transl Oncol. 2016 Nov 24;10(1):40–5. doi: 10.1016/j.tranon.2016.11.001 (PMC5126145; doi:10.1016/j.tranon.2016.11.001), 2016-11-24
Supplement: mmc1.pdf [file mmc1.pdf]

**Supplementary table 1.** The AUCs and corresponding sensitivity and specificity of the prediction model and two miRNA biomarkers in a training set of patients with pulmonary nodules

|                         | AUC  | Sensitivity (95% CI)  | Specificity (95% CI)  |
|-------------------------|------|-----------------------|-----------------------|
| The prediction model    | 0.91 | 80.3 (68.7% to 89.1%) | 89.4 (79.4% to 95.6%) |
| The panel of two miRNAs | 0.80 | 72.6 (60.9% to 82.4%) | 81.9 (72.0% to 89.5%) |

Abbreviations: AUC, the area under receiver operating characteristic curve; CI, confidence interval.

**Supplementary table 2.** The sensitivity and specificity of the prediction model for detection of SCC in pulmonary nodules

| <u>A training set</u>       |                             | <u>A testing set</u>        |                             |
|-----------------------------|-----------------------------|-----------------------------|-----------------------------|
| <u>Sensitivity (95% CI)</u> | <u>Specificity (95% CI)</u> | <u>Sensitivity (95% CI)</u> | <u>Specificity (95% CI)</u> |
| 80.4 (70.9% to 88.3%)       | 94.8 (87.2% to 98.6%)       | 81.8 (59.7% to 94.8%)       | 94.6 (84.9% to 98.9%)       |

Abbreviations: SCC, squamous cell carcinoma; AUC, the area under receiver operating characteristic curve; CI, confidence interval.

**Supplementary table 3.** The AUCs and corresponding sensitivity and specificity of the prediction model and two miRNA biomarkers in a testing set of patients with pulmonary nodules

|                         | AUC  | Sensitivity (95% CI)  | Specificity (95% CI)  |
|-------------------------|------|-----------------------|-----------------------|
| The prediction model    | 0.91 | 80.4 (67.6% to 89.8%) | 89.1 (77.8% to 95.9%) |
| The panel of two miRNAs | 0.80 | 73.2 (59.7% to 84.2%) | 81.2 (69.1% to 90.9%) |

Abbreviations: AUC, the area under receiver operating characteristic curve; CI, confidence interval.
